# Supplementary material
Source: PubMed Central journal article supplement (PMC4115569)
Supplement: 1401849111_pnas.201401849SI.pdf [file 1401849111_pnas.201401849SI.pdf]

# Supporting Information

Wikramaratna et al. 10.1073/pnas.1401849111

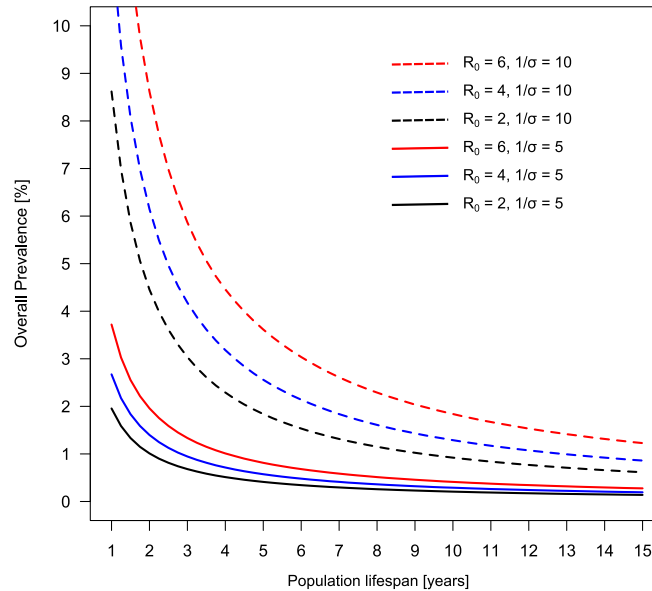

**Fig. S1.** Dependence of overall prevalence on  $R_0$ , the infectious period ( $1/\sigma$ ), and population lifespan. Overall prevalence is calculated as the mean fraction of the host population that is infected with at least one strain of influenza at any one time. (Other parameters used were  $\gamma = 0.70$ .)

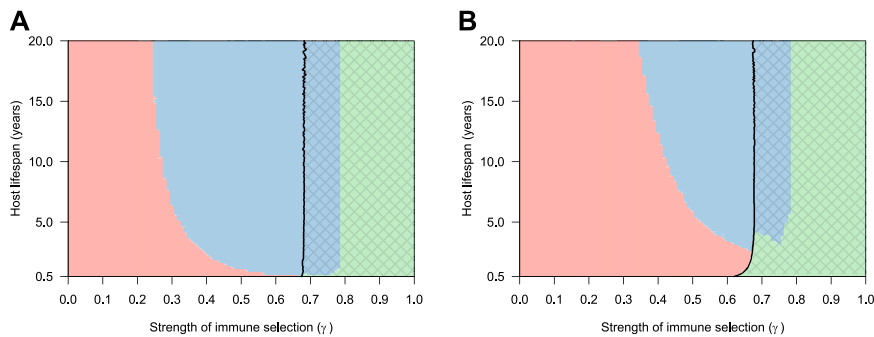

**Fig. S2.** (A and B) Dependence of model behavior on the strength of immune selection ( $\gamma$ ), host lifespan ( $1/\mu$ ) for two different host infectious periods, (A) 5 d and (B) 30 d, within a {2, 3, 5} antigenic structure of  $R_0 = 2$ . Three distinct behaviors can be observed: (i) no strain structure (red) where all antigenic types cocirculate at a stable, equal prevalence; (ii) cyclical or chaotic strain structure (blue), where individual antigenic types oscillate in prevalence; and (iii) discrete strain structure (green), where the prevalence of antigenic types is stable but unequal (more information in refs. 1–3). The cross-hatching indicates the region of parameter space where immune selection acts to permanently suppress a subset of antigenic types (defined here as never acquiring prevalence greater than  $10^{-4}$ ).

1. Gupta S, Ferguson N, Anderson R (1998) Chaos, persistence, and evolution of strain structure in antigenically diverse infectious agents. *Science* 280(5365):912–915.
2. Recker M, Pybus OG, Nee S, Gupta S (2007) The generation of influenza outbreaks by a network of host immune responses against a limited set of antigenic types. *Proc Natl Acad Sci USA* 104(18):7711–7716.
3. Wikramaratna PS, Sandeman M, Recker M, Gupta S (2013) The antigenic evolution of influenza: Drift or thrift? *Philos Trans R Soc Lond B Biol Sci* 368(1614):20120200.



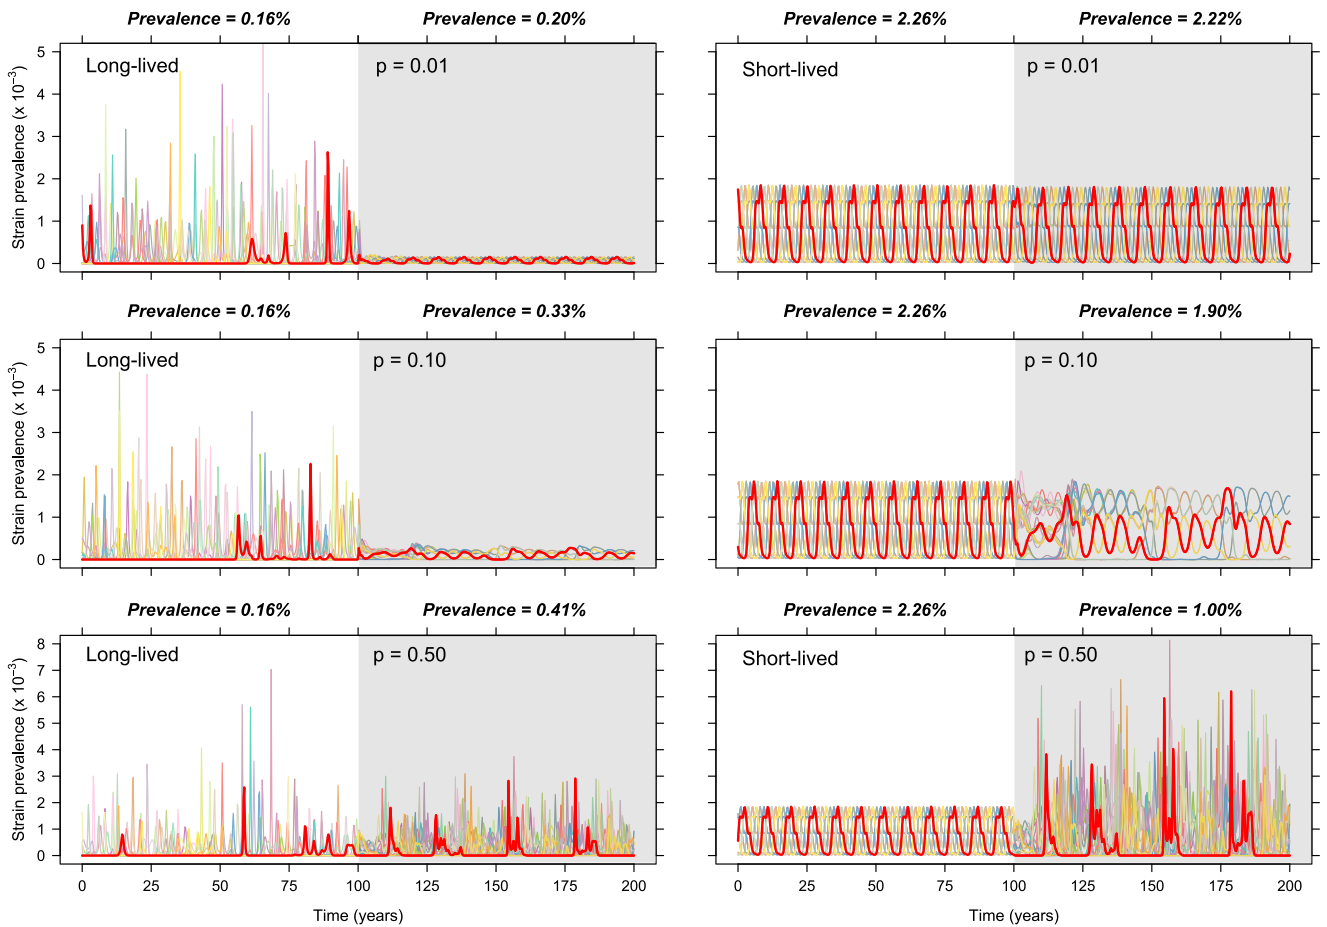

**Fig. S5.** Effects of increasing proportion of cross-species transmission,  $p$ , on antigenic dynamics within long-lived (life expectancy = 15 y) and short-lived (life expectancy = 1 y) species. Each color corresponds to a different strain within a {2, 3, 5} antigenic system (with one highlighted with a thick red line) before (unshaded background) and after (shaded background) the two host species are linked. The change in mean overall prevalence caused by the interaction is shown above each panel. (Other parameters:  $\beta = 146$ ,  $1/\sigma = 5$  d,  $\gamma = 0.65$ .)



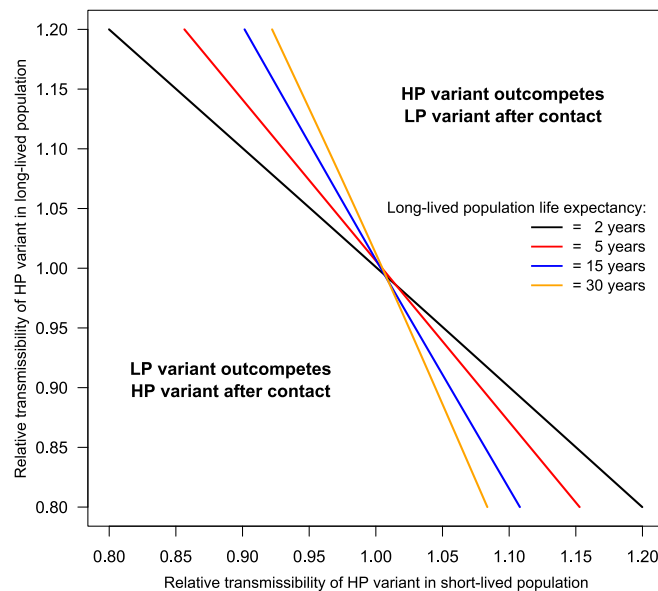

**Fig. S7.** The relative transmissibility of the highly pathogenic (HP) variant of an antigenic type within each population affects whether it will outcompete its low pathogenicity (LP) counterpart when the two populations are connected. Here, the LP variants of all antigenic types have the same transmissibility ( $\beta_i = 146$ ) and the HP variants have zero transmissibility for all but one antigenic type ( $\beta_i = 0$ ). For the remaining antigenic type, we vary the relative transmissibility of the HP variant in both populations and determine which variant of this type circulates in the long term following contact between the two populations. Of course, if one variant is more transmissible than the other in both populations, then it continues to circulate following contact. If, however, the HP variant is more transmissible in one and less so in the other, then the critical values for relative transmissibility are dependent on the life expectancies of the two populations. In particular, there is increasing emphasis on transmissibility in the short-lived population (life expectancy = 2 y) as the difference in life expectancy increases (shown by the different colored lines). Other parameters: a {2, 3, 5} antigenic system,  $1/\sigma = 5$  d,  $\gamma = 0.65$ , and  $P = 0.5$ .

**Table S1. Bird species that tested positive for influenza A by RT-PCR in The Netherlands (1), together with adult per-capita mortality rate data from the British Trust for Ornithology website ([www.bto.org/about-birds/birdfacts](http://www.bto.org/about-birds/birdfacts))**

| Species             | Adult per capita mortality rate, /y | Samples | No. positive | %   |
|---------------------|-------------------------------------|---------|--------------|-----|
| Mallard             | 0.373                               | 5,325   | 282          | 5.3 |
| Eurasian wigeon     | 0.470                               | 2,519   | 76           | 3.0 |
| Common teal         | 0.470                               | 856     | 50           | 5.8 |
| Northern pintail    | 0.337                               | 431     | 12           | 2.8 |
| Gadwall             | 0.280                               | 298     | 8            | 2.7 |
| White-fronted goose | 0.276                               | 3,821   | 80           | 2.1 |
| Barnacle goose      | 0.090                               | 811     | 8            | 1.0 |
| Greylag goose       | 0.170                               | 455     | 11           | 2.4 |
| Brent goose         | 0.100                               | 401     | 4            | 1.0 |
| Bean goose          | 0.230                               | 315     | 2            | 0.6 |
| Pink-footed goose   | 0.171                               | 285     | 6            | 2.1 |
| Black-headed gull   | 0.100                               | 684     | 5            | 0.7 |
| Common gull         | 0.140                               | 224     | 2            | 0.9 |
| Herring gull        | 0.120                               | 735     | 5            | 0.7 |
| Common coot         | 0.299                               | 235     | 1            | 0.4 |

1. Munster VJ, et al. (2007) Spatial, temporal, and species variation in prevalence of influenza A viruses in wild migratory birds. *PLoS Pathog* 3(5):e61.
